# Supplementary material for: The conspiratorial style in lay economic thinking
Source: PubMed Central journal article supplement (PMC5336227; doi:10.1371/journal.pone.0171238), 2017-03-03
Supplement: pone.0171238.s004.pdf [file pone.0171238.s004.pdf]

**S4 Table. Sample Composition for Psycho-Social Scales and Demographics.**

|                             | All | USA | Israel | Swiss |
|-----------------------------|-----|-----|--------|-------|
| Big 5                       | 238 | 101 | 77     | 60    |
| Right Wing Authoritarianism | 238 | 101 | 77     | 60    |
| Satisfaction                | 256 | 101 | 95     | 60    |
| Lack of control             | 256 | 101 | 95     | 60    |
| Distrust                    | 256 | 101 | 95     | 60    |
| Internal Locus of control   | 196 | 101 | 95     | 0     |
| Belief in a Dangerous World | 256 | 101 | 95     | 60    |
| Irrationality               | 238 | 101 | 77     | 60    |
| Conspiracy Theory           | 60  | 0   | 0      | 60    |
| Age                         | 289 | 101 | 128    | 60    |
| Demographics                | 229 | 101 | 128    | 0     |
