# Supplementary material for: The conspiratorial style in lay economic thinking
Source: PubMed Central journal article supplement (PMC5336227; doi:10.1371/journal.pone.0171238), 2017-03-03
Supplement: pone.0171238.s005.pdf [file pone.0171238.s005.pdf]

**S5 Table. Pearson Correlation Coefficients by Sample.**

**US Sample.**

|                                           | 1      | 2     | 3     | 4     | 5     | 6     | 7     | 8     | 9    | 10    | 11   | 12   | 13    | 14    | 15    | 16   | 17   | 18  |
|-------------------------------------------|--------|-------|-------|-------|-------|-------|-------|-------|------|-------|------|------|-------|-------|-------|------|------|-----|
| 1. <i>Econ101</i> view (A)                |        |       |       |       |       |       |       |       |      |       |      |      |       |       |       |      |      |     |
| 2. <i>Government Malfunction</i> view (B) | .13    |       |       |       |       |       |       |       |      |       |      |      |       |       |       |      |      |     |
| 3. <i>Conspiracy</i> view (C)             | -.11   | .72** |       |       |       |       |       |       |      |       |      |      |       |       |       |      |      |     |
| 4. <i>Bad Invisible Hand</i> view (D)     | .31**  | .65** | .58** |       |       |       |       |       |      |       |      |      |       |       |       |      |      |     |
| 5. Right-Wing Authoritarianism            | .12    | -.10  | -.16  | -.15  |       |       |       |       |      |       |      |      |       |       |       |      |      |     |
| 6. Satisfaction                           | .13    | .09   | .03   | .02   | .09   |       |       |       |      |       |      |      |       |       |       |      |      |     |
| 7. Lack of control                        | -.03   | .33** | .35** | .25*  | .22*  | -.02  |       |       |      |       |      |      |       |       |       |      |      |     |
| 8. Distrust of politicians                | .03    | .36** | .35** | .32** | -.04  | .08   | .56** |       |      |       |      |      |       |       |       |      |      |     |
| 9. Internal Locus of Control              | .24*   | .17   | .06   | .14   | .16   | .48** | -.07  | .07   |      |       |      |      |       |       |       |      |      |     |
| 10. Belief in a Dangerous World           | .16    | .23*  | .29** | .09   | .38** | .15   | .54** | .32** | .03  |       |      |      |       |       |       |      |      |     |
| 11. Irrationality                         | -.16   | .08   | .19   | -.05  | .13   | .13   | -.04  | -.14  | .04  | .25*  |      |      |       |       |       |      |      |     |
| 12. Openness                              | .14    | .10   | .02   | .07   | -.18  | .17   | -.23* | -.07  | .14  | -.11  | .04  |      |       |       |       |      |      |     |
| 13. Age                                   | .08    | .14   | .04   | .04   | .16   | .02   | .03   | .06   | .01  | .01   | .13  | -.15 |       |       |       |      |      |     |
| 14. Sex                                   | -.14   | .02   | -.05  | -.11  | .14   | .19   | -.03  | -.18  | -.01 | .15   | .26* | -.07 | .33** |       |       |      |      |     |
| 15. Educational level                     | -.16   | -.17  | -.07  | -.08  | -.03  | -.16  | -.15  | -.19  | -.11 | -.18  | .03  | -.19 | .16   | .05   |       |      |      |     |
| 16. Religion                              | -.09   | -.09  | -.05  | -.19  | .52** | .05   | .07   | -.02  | .06  | .28** | .11  | -.13 | .25*  | .35** | .06   |      |      |     |
| 17. Socio-Economic Status                 | -.05   | -.17  | -.17  | -.18  | .00   | .21*  | .00   | .11   | .10  | -.08  | -.06 | -.04 | .01   | .07   | .14   | -.03 |      |     |
| 18. Economic training                     | -.27** | -.07  | .04   | -.03  | -.18  | -.06  | -.13  | .03   | .07  | -.15  | .05  | -.04 | .04   | -.25* | .43** | -.13 | .12  |     |
| 19. Personally affected by the crisis     | -.14   | .12   | .07   | .10   | -.05  | -.11  | .05   | -.04  | -.11 | -.02  | .19  | -.13 | .26** | .10   | .13   | .08  | -.11 | .19 |

*Note: \*  $p < .05$  ; \*\*  $p < .01$  (two-tailed tests).*

**Israeli Sample.**

|                                           | 1      | 2     | 3      | 4     | 5     | 6      | 7     | 8      | 9     | 10    | 11   | 12   | 13    | 14    | 15     | 16    | 17     | 18   |
|-------------------------------------------|--------|-------|--------|-------|-------|--------|-------|--------|-------|-------|------|------|-------|-------|--------|-------|--------|------|
| 1. <i>Econ101</i> view (A)                |        |       |        |       |       |        |       |        |       |       |      |      |       |       |        |       |        |      |
| 2. <i>Government Malfunction</i> view (B) | .26**  |       |        |       |       |        |       |        |       |       |      |      |       |       |        |       |        |      |
| 3. <i>Conspiracy</i> view (C)             | -.17*  | .67** |        |       |       |        |       |        |       |       |      |      |       |       |        |       |        |      |
| 4. <i>Bad Invisible Hand</i> view (D)     | .36**  | .69** | .55**  |       |       |        |       |        |       |       |      |      |       |       |        |       |        |      |
| 5. Right-Wing Authoritarianism            | .35**  | .10   | -.05   | .11   |       |        |       |        |       |       |      |      |       |       |        |       |        |      |
| 6. Satisfaction                           | .23*   | -.12  | -.29** | -.06  | .35*  |        |       |        |       |       |      |      |       |       |        |       |        |      |
| 7. Lack of control                        | -.19   | .12   | .18    | -.02  | .01   | -.22*  |       |        |       |       |      |      |       |       |        |       |        |      |
| 8. Distrust of politicians                | -.39** | .26*  | .48**  | .05   | -.26  | -.24*  | .42** |        |       |       |      |      |       |       |        |       |        |      |
| 9. Internal Locus of Control              | .29**  | .04   | -.12   | .10   | .37*  | .51**  | -.17  | -.30** |       |       |      |      |       |       |        |       |        |      |
| 10. Belief in a Dangerous World           | .04    | .44** | .44**  | .32** | .18   | -.22*  | .23*  | .37**  | -.09  |       |      |      |       |       |        |       |        |      |
| 11. Irrationality                         | -.30** | -.16  | .11    | -.08  | .13   | -.13   | .23   | .26    | -.07  | -.11  |      |      |       |       |        |       |        |      |
| 12. Openness                              | .03    | .07   | .17    | .11   | -.16  | .08    | .01   | .05    | .15   | .12   | .15  |      |       |       |        |       |        |      |
| 13. Age                                   | .07    | -.02  | -.05   | -.08  | .05   | -.31** | -.18  | -.03   | -.22* | .11   | -.13 | .06  |       |       |        |       |        |      |
| 14. Sex                                   | .08    | .11   | .13    | .11   | .03   | .03    | .01   | .04    | .09   | .16   | .16  | .04  | -.16  |       |        |       |        |      |
| 15. Educational level                     | .20*   | .12   | .02    | .13   | -.10  | .01    | .06   | -.06   | .03   | -.11  | -.16 | -.19 | -.03  | .00   |        |       |        |      |
| 16. Religion                              | .03    | -.08  | .08    | -.04  | .40** | -.04   | -.04  | -.08   | .01   | .04   | .21  | -.02 | -.01  | .12   | -.15   |       |        |      |
| 17. Socio-Economic Status                 | .13    | -.23* | -.24** | -.12  | -.08  | .33**  | -.10  | -.23*  | -.02  | -.23* | -.11 | -.15 | -.07  | -.18* | .27**  | -.18* |        |      |
| 18. Economic training                     | .20*   | .04   | -.07   | .09   | .09   | .08    | -.07  | -.17   | -.04  | .03   | .06  | .10  | .09   | -.14  | .26**  | .11   | .17    |      |
| 19. Personally affected by the crisis     | -.16   | .07   | .12    | .01   | .15   | -.32*  | -.21  | .08    | .04   | .18   | .12  | -.04 | .32** | .01   | -.39** | .24*  | -.53** | -.05 |

Note: \*  $p < .05$  ; \*\*  $p < .01$  (two-tailed tests).

**Swiss Sample.**

|                                           | 1     | 2     | 3     | 4     | 5     | 6     | 7    | 8     | 9     | 10   | 11   | 12  | 13   | 14   | 15   |
|-------------------------------------------|-------|-------|-------|-------|-------|-------|------|-------|-------|------|------|-----|------|------|------|
| 1. <i>Econ101</i> view (A)                |       |       |       |       |       |       |      |       |       |      |      |     |      |      |      |
| 2. <i>Government Malfunction</i> view (B) | .10   |       |       |       |       |       |      |       |       |      |      |     |      |      |      |
| 3. <i>Conspiracy</i> view (C)             | .09   | .75** |       |       |       |       |      |       |       |      |      |     |      |      |      |
| 4. <i>Bad Invisible Hand</i> view (D)     | .57** | .38** | .32*  |       |       |       |      |       |       |      |      |     |      |      |      |
| 5. Right-Wing Authoritarianism            | .36** | -.04  | .05   | -.04  |       |       |      |       |       |      |      |     |      |      |      |
| 6. Satisfaction                           | .12   | -.04  | -.08  | .08   | -.11  |       |      |       |       |      |      |     |      |      |      |
| 7. Lack of control                        | .02   | .12   | .19   | -.01  | .18   | -.30* |      |       |       |      |      |     |      |      |      |
| 8. Distrust of politicians                | .18   | .53** | .59** | .34** | .16   | .00   | .19  |       |       |      |      |     |      |      |      |
| 9. Belief in a Dangerous World            | .38** | .32*  | .41** | .34** | .58** | -.20  | .14  | .55** |       |      |      |     |      |      |      |
| 10. Irrationality                         | -.22  | -.16  | .03   | -.25  | -.07  | -.08  | .00  | .16   | .09   |      |      |     |      |      |      |
| 11. Openness                              | -.13  | .24   | .04   | .23   | -.33* | .01   | -.16 | -.06  | -.10  | -.08 |      |     |      |      |      |
| 12. Conspiracy Theories                   | .06   | .43** | .48** | .13   | .25   | -.07  | .19  | .45** | .42** | .15  | -.05 |     |      |      |      |
| 13. Age                                   | -.17  | .04   | .19   | -.03  | -.14  | .14   | .04  | -.07  | -.05  | -.05 | -.13 | .03 |      |      |      |
| 14. Sex                                   | .35** | -.05  | -.12  | .29*  | .06   | .28*  | -.08 | .16   | .18   | .14  | .04  | .08 | -.09 |      |      |
| 15. Personally affected by the crisis     | -.36  | .19   | .30   | -.05  | .04   | -.17  | .42* | .09   | .07   | .26  | -.01 | .25 | .02  | -.07 | -.06 |

Note: \*  $p < .05$  ; \*\*  $p < .01$  (two-tailed tests).
